# Supplementary material
Source: PubMed Central journal article supplement (PMC3968243)
Supplement: NIHMS532114-supplement-supplement_1.pdf [file NIHMS532114-supplement-supplement_1.pdf]

**Table S1. Characteristics of non-diabetic subjects genotyped in Sample 1 (subset for whole exome sequencing,  $n=177$ ).**

|                                                                                                                                           | Males                                  | Females                               |
|-------------------------------------------------------------------------------------------------------------------------------------------|----------------------------------------|---------------------------------------|
| N                                                                                                                                         | 325 (103)                              | 230 (74)                              |
| Age range (yrs)                                                                                                                           | 18–46 (18–35)                          | 18–42 (18–36)                         |
| Mean Age (yrs) $\pm$ SD                                                                                                                   | 26.7 $\pm$ 6.3 (23.3 $\pm$ 4.5)        | 26.9 $\pm$ 5.9 (25.3 $\pm$ 4.9)       |
| Mean BMI ( $\text{kg}/\text{m}^2$ ) $\pm$ SD                                                                                              | 32.8 $\pm$ 7.6 (32.0 $\pm$ 7.4)        | 34.3 $\pm$ 7.3 (25.3 $\pm$ 4.9)       |
| Mean PFAT (%) $\pm$ SD                                                                                                                    | 28.1 $\pm$ 7.4 (27.4 $\pm$ 8.1)        | 38.2 $\pm$ 6.4 (39.7 $\pm$ 5.0)       |
| Mean $\log_{10}$ of glucose disposal rates during insulin infusions ( $\text{mg}\cdot\text{kg EMBS}^{*-1}\cdot\text{min}^{-1}$ ) $\pm$ SD | 0.56 $\pm$ 0.14 (0.46 $\pm$ 0.16)      | 0.54 $\pm$ 0.10 (0.37 $\pm$ 0.08)     |
| Mean $\log_{10}$ acute insulin response <sup>†</sup> ( $\mu\text{U}/\text{ml}$ ) $\pm$ SD                                                 | 2.32 $\pm$ 0.28 (2.37 $\pm$ 0.27)      | 2.32 $\pm$ 0.28 (2.37 $\pm$ 0.22)     |
| Mean 2-hour plasma glucose concentrations ( $\text{mg}/\text{dl}$ ) $\pm$ SD                                                              | 114.9 $\pm$ 28.4 (111.0 $\pm$ 29.5)    | 132.4 $\pm$ 29.9 (132.4 $\pm$ 29.3)   |
| Disposition index <sup>†</sup> ( $\text{mg}\cdot\text{kg}\cdot\mu\text{U EMBS}^{*-1}\cdot\text{min}^{-1}\text{ml}^{-1}$ ) $\pm$ SD        | 906.4 $\pm$ 517.1 (1018.5 $\pm$ 550.8) | 882.6 $\pm$ 566.6 (957.1 $\pm$ 540.0) |

\*EMBS= estimated metabolic body size; † only full-heritage Pima Indians with normal glucose tolerance (N=297) were analyzed for AIR and disposition index.

**Table S2. Characteristics of full-heritage Pima Indians genotyped in Sample 2.**

| Analysis                   | N    | Diabetes status             | Mean age (years) $\pm$ SD | Mean max BMI ( $\text{kg}/\text{m}^2$ ) $\pm$ SD |
|----------------------------|------|-----------------------------|---------------------------|--------------------------------------------------|
| Type 2 Diabetes            | 3604 | 46% Diabetic (37% male)     | 49.1 $\pm$ 14.1           | 38.7 $\pm$ 8.6                                   |
|                            |      | 54% Nondiabetic (48% male)  | 32.1 $\pm$ 14.6           | 36.1 $\pm$ 8.5                                   |
| Maximum recorded BMI       | 2842 | 100% Nondiabetic (42% male) | 32.1 $\pm$ 11.8           | 36.3 $\pm$ 8.2                                   |
| Maximum childhood z-score* | 2276 | 100% Nondiabetic (45% male) | 13.9 $\pm$ 4.0            | 0.3 $\pm$ 1.1                                    |

\* Childhood z-score is the highest age and sex adjusted z-score from an exam at age <20yrs. For Presentation, the Z-scores were sex and age (female, 12yr) standardized to a BMI scale.

**Table S3. Characteristics of mixed-heritage American Indians genotyped in Sample 3**

| Analysis                   | N    | Diabetes status             | Mean age (yrs) $\pm$ SD at max BMI | Mean max BMI ( $\text{kg}/\text{m}^2$ ) $\pm$ SD |
|----------------------------|------|-----------------------------|------------------------------------|--------------------------------------------------|
| Type 2 Diabetes            | 4063 | 21% Diabetic (41% male)     | 41.1 $\pm$ 14.2                    | 38.7 $\pm$ 8.7                                   |
|                            |      | 79% Nondiabetic (47% male)  | 24.9 $\pm$ 11.9                    | 33.5 $\pm$ 8.4                                   |
| Maximum recorded BMI       | 3038 | 100% Nondiabetic (45% male) | 27.3 $\pm$ 10.5                    | 34.0 $\pm$ 8.4                                   |
| Maximum childhood z-score* | 3040 | 100% Nondiabetic (46% male) | 13.7 $\pm$ 3.8                     | 0.3 $\pm$ 1.2                                    |

\* Childhood z-score is the highest age and sex adjusted z-score from an exam at age <20yrs. For Presentation, the Z-scores were sex and age (female, 12yr) standardized to a BMI scale.

**Table S4. Summary of variants identified in 177 Pima Indian exomes (~38Mb capture).**

| Variant Frequency | Variant counts (% novel) | Coding               |                   | 5' UTR | 3' UTR | Splicing sites | Intron | ncRNA | Intergenic |
|-------------------|--------------------------|----------------------|-------------------|--------|--------|----------------|--------|-------|------------|
|                   |                          | Nonsynonymous coding | Synonymous coding |        |        |                |        |       |            |
| 0.01 - 0.05       | 34,191 (31.7%)           | 4,607                | 3,386             | 311    | 932    | 55             | 18,863 | 1,925 | 4,112      |
| 0.05 - 0.1        | 22,434 (8.9%)            | 2,437                | 2,254             | 223    | 636    | 26             | 12,700 | 1,367 | 2,791      |
| 0.1 - 0.5         | 91,991 (4.0%)            | 8,755                | 10,002            | 832    | 2,564  | 70             | 53,099 | 5,217 | 11,452     |
| Total             | 148,616 (11.1%)          | 15,799               | 15,642            | 1,366  | 4,132  | 151            | 84,662 | 8,509 | 18,355     |

Figure S1. Genotyping strategy.

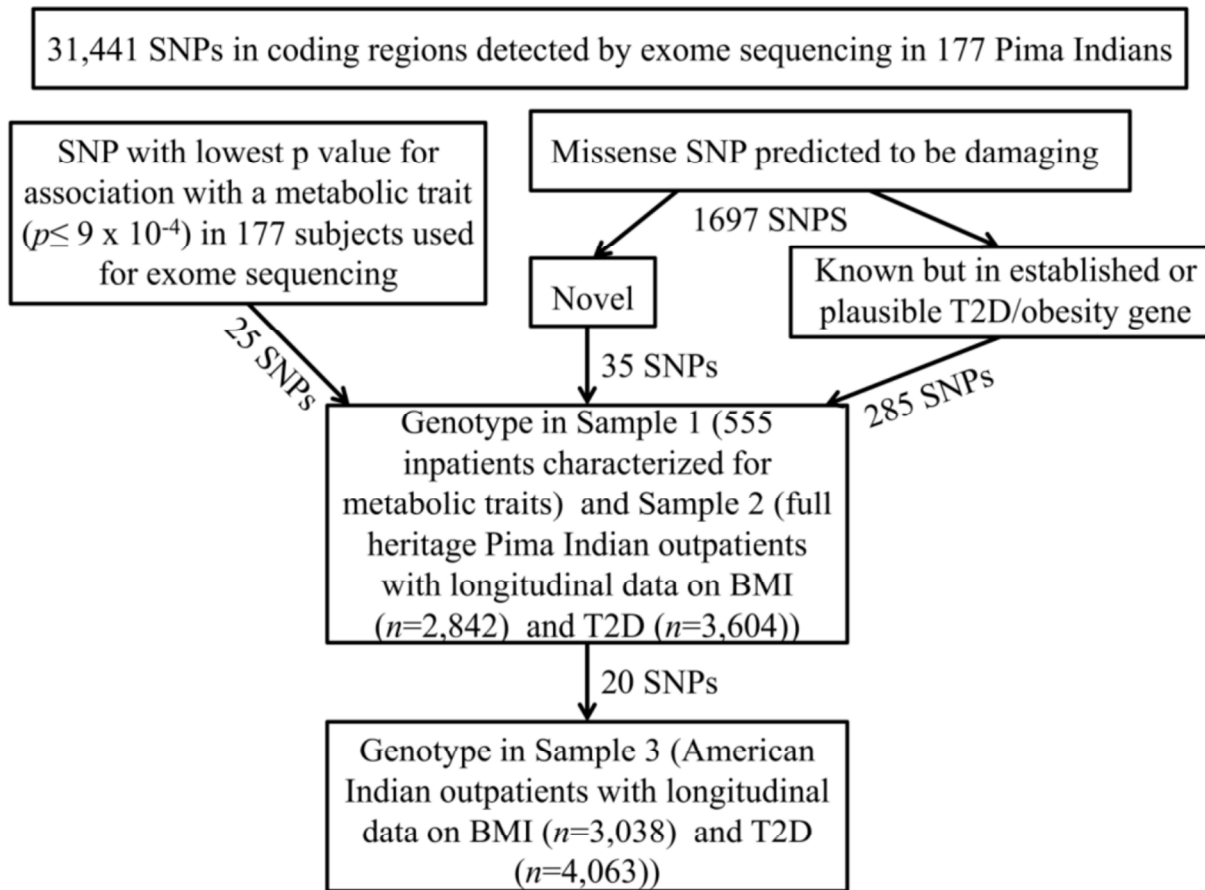

**Table S5: Association data for coding SNPs with PFAT, Log<sub>10</sub>M, 2-hr glucose, Log<sub>10</sub>AIR, disposition index, maximum childhood z-score, maximum recorded BMI and T2D in full heritage Pima Indians. Only SNPs with  $p \leq 0.05$  for any trait are shown.**

| chr:SNP       | Gene            | R/NR allele | fR   | Sample 1     |                |                             |                |                      |                |                               |                |                                             |                | Sample 2                                         |                |                                             |                |               |                |
|---------------|-----------------|-------------|------|--------------|----------------|-----------------------------|----------------|----------------------|----------------|-------------------------------|----------------|---------------------------------------------|----------------|--------------------------------------------------|----------------|---------------------------------------------|----------------|---------------|----------------|
|               |                 |             |      | PFAT (N=555) |                | Log <sub>10</sub> M (N=555) |                | 2-hr glucose (N=555) |                | Log <sub>10</sub> AIR (N=297) |                | Log <sub>10</sub> Disposition index (N=297) |                | Maximum Childhood z-score <sup>§</sup> (N=2,276) |                | Maximum Recorded BMI <sup>§</sup> (N=2,842) |                | T2D (N=3,604) |                |
|               |                 |             |      | beta         | P*             | beta                        | p <sup>†</sup> | beta                 | p <sup>†</sup> | beta                          | p <sup>‡</sup> | beta                                        | p <sup>‡</sup> | beta                                             | p <sup>§</sup> | beta                                        | p <sup>§</sup> | OR            | p <sup>§</sup> |
| 1:rs2890565   | <i>UTS2</i>     | C/T         | 0.55 | -0.418       | 0.38           | -0.012                      | <b>0.05</b>    | 6.698                | <b>7.0E-05</b> | -0.009                        | 0.67           | -0.014                                      | 0.54           | 0.038                                            | 0.23           | -0.007                                      | 0.26           | 0.96          | 0.54           |
| 1:rs6688832   | <i>H6PD</i>     | T/C         | 0.43 | 0.177        | 0.69           | -0.007                      | 0.33           | 4.207                | <b>0.02</b>    | -0.050                        | 0.06           | -0.052                                      | 0.06           | 0.034                                            | 0.30           | 0.006                                       | 0.32           | 1.01          | 0.83           |
| 1:rs4845898   | <i>VPS13D</i>   | A/T         | 0.77 | 0.592        | 0.28           | 0.001                       | 0.86           | -1.061               | 0.56           | 0.050                         | <b>0.04</b>    | -0.051                                      | 0.06           | 0.006                                            | 0.85           | 0.009                                       | 0.21           | 0.89          | 0.10           |
| 1:rs6429757   | <i>AGMAT</i>    | G/C         | 0.68 | 0.534        | 0.26           | -0.007                      | 0.32           | 3.619                | 0.04           | -0.071                        | <b>4.2E-03</b> | 0.076                                       | <b>0.004</b>   | 0.014                                            | 0.68           | 0.003                                       | 0.65           | 0.94          | 0.40           |
| 1:rs848210    | <i>SPEN</i>     | A/G         | 0.15 | 1.696        | <b>1.5E-03</b> | -0.007                      | 0.39           | 3.609                | 0.13           | 0.009                         | 0.74           | -0.001                                      | 0.99           | -0.003                                           | 0.95           | -0.009                                      | 0.30           | 0.86          | 0.06           |
| 1:rs1057746   | <i>SSX2IP</i>   | T/C         | 0.49 | 1.163        | <b>2.8E-03</b> | -0.010                      | 0.11           | 1.759                | 0.31           | 0.027                         | 0.20           | 0.021                                       | 0.34           | 0.069                                            | 0.03           | 0.008                                       | 0.20           | 0.99          | 0.89           |
| 1:rs3768235   | <i>BCL10</i>    | G/A         | 0.93 | -1.289       | 0.07           | 0.005                       | 0.63           | -1.468               | 0.56           | -0.087                        | <b>2.1E-03</b> | 0.093                                       | <b>1.4E-03</b> | -0.049                                           | 0.40           | -0.017                                      | 0.15           | 1.02          | 0.83           |
| 1:rs41274114  | <i>SYT6</i>     | A/G         | 0.18 | 0.384        | 0.50           | 0.002                       | 0.81           | 4.690                | 0.07           | -0.030                        | 0.45           | -0.030                                      | 0.47           | -0.049                                           | 0.23           | -0.014                                      | 0.08           | 0.93          | 0.40           |
| 1:rs509749    | <i>LY9</i>      | A/G         | 0.09 | -0.388       | 0.59           | -0.016                      | 0.14           | 6.571                | <b>0.01</b>    | -0.032                        | 0.42           | -0.051                                      | 0.20           | -0.026                                           | 0.62           | -0.010                                      | 0.35           | 1.07          | 0.49           |
| 1:rs913257    | <i>GORAB</i>    | A/G         | 0.87 | 1.537        | <b>0.02</b>    | -0.019                      | <b>0.05</b>    | -1.120               | 0.68           | -0.005                        | 0.89           | -0.017                                      | 0.64           | 0.068                                            | 0.14           | 0.017                                       | 0.07           | 1.12          | 0.23           |
| 1:rs3176443   | <i>FAM5B</i>    | C/G         | 0.07 | -1.668       | <b>0.04</b>    | -0.007                      | 0.61           | 0.406                | 0.90           | -0.140                        | <b>5.0E-04</b> | -0.141                                      | <b>5.0E-04</b> | -0.046                                           | 0.48           | -0.008                                      | 0.53           | 0.90          | 0.45           |
| 1:rs4252716   | <i>MDM4</i>     | A/G         | 0.94 | 2.561        | <b>0.01</b>    | -0.035                      | <b>0.01</b>    | 7.508                | <b>0.05</b>    | -0.006                        | 0.86           | -0.021                                      | 0.56           | 0.033                                            | 0.63           | 0.015                                       | 0.27           | 1.11          | 0.45           |
| 1:rs1136410   | <i>PARP1</i>    | C/T         | 0.67 | 1.463        | <b>1.6E-03</b> | -0.005                      | 0.41           | 0.074                | 0.97           | 0.026                         | 0.32           | 0.016                                       | 0.55           | 0.017                                            | 0.61           | 0.012                                       | 0.06           | 0.96          | 0.55           |
| 1:rs2274067   | <i>C1orf131</i> | C/G         | 0.62 | 1.029        | <b>0.02</b>    | -0.005                      | 0.46           | -0.776               | 0.69           | -0.017                        | 0.47           | 0.022                                       | 0.36           | 0.039                                            | 0.27           | 0.009                                       | 0.18           | 0.88          | <b>0.04</b>    |
| 2:rs1801699   | <i>APOB</i>     | T/C         | 0.86 | 1.329        | <b>0.03</b>    | -0.013                      | 0.21           | 2.728                | 0.26           | 0.029                         | 0.49           | 0.021                                       | 0.62           | 0.058                                            | 0.19           | 0.008                                       | 0.36           | 0.89          | 0.16           |
| 2:rs188718007 | <i>MFSD2B</i>   | C/G         | 0.10 | -0.203       | 0.76           | -0.017                      | 0.07           | 5.372                | <b>0.05</b>    | -0.051                        | 0.24           | -0.060                                      | 0.18           | -0.048                                           | 0.35           | -0.001                                      | 0.94           | 1.09          | 0.38           |
| 2:rs1052161   | <i>ALMS1</i>    | T/C         | 0.82 | 0.471        | 0.42           | -0.011                      | 0.16           | 2.207                | 0.29           | -0.048                        | 0.07           | -0.057                                      | 0.05           | 0.027                                            | 0.50           | 0.015                                       | <b>0.05</b>    | 0.95          | 0.48           |
| 2:rs6715329   | <i>FAM178B</i>  | C/T         | 0.08 | -1.696       | 0.06           | -0.010                      | 0.46           | 7.394                | <b>0.04</b>    | -0.100                        | <b>0.04</b>    | 0.093                                       | <b>0.05</b>    | 0.058                                            | 0.37           | 0.006                                       | 0.63           | 1.02          | 0.90           |
| 2:rs6746030   | <i>SCN9A</i>    | A/G         | 0.11 | 2.380        | <b>2.1E-04</b> | -0.013                      | 0.22           | 4.423                | 0.13           | -0.014                        | 0.73           | -0.033                                      | 0.40           | 0.044                                            | 0.36           | 0.017                                       | 0.09           | 1.06          | 0.54           |
| 2:169830328   | <i>ABCB11</i>   | G/A         | 0.31 | -0.295       | 0.54           | -0.007                      | 0.31           | 3.951                | <b>0.03</b>    | -0.023                        | 0.34           | 0.024                                       | 0.33           | 0.049                                            | 0.15           | 0.000                                       | 1.00           | 0.92          | 0.21           |
| 2:rs6433818   | <i>CWC22</i>    | A/T         | 0.18 | 0.789        | 0.18           | -0.014                      | <b>0.05</b>    | -0.355               | 0.87           | 0.003                         | 0.93           | 0.006                                       | 0.86           | -0.062                                           | 0.14           | 0.007                                       | 0.33           | 0.98          | 0.79           |
| 2:rs10804166  | <i>C2orf80</i>  | A/G         | 0.15 | 0.610        | 0.28           | -0.027                      | <b>8.9E-04</b> | 2.255                | 0.31           | -0.025                        | 0.43           | -0.047                                      | 0.14           | 0.025                                            | 0.58           | 0.016                                       | 0.06           | 1.00          | 0.97           |
| 2:rs3770214   | <i>ZNF142</i>   | C/T         | 0.69 | -0.034       | 0.94           | -0.024                      | <b>1.0E-03</b> | 0.574                | 0.78           | 0.010                         | 0.72           | 0.010                                       | 0.71           | 0.042                                            | 0.22           | 0.006                                       | 0.38           | 0.90          | 0.13           |

| chr:SNP             | Gene                 | R/NR allele | fR   | Sample 1     |                |                             |                |                      |                |                               |                |                                             |                | Sample 2                                         |                |                                             |                |               |                |
|---------------------|----------------------|-------------|------|--------------|----------------|-----------------------------|----------------|----------------------|----------------|-------------------------------|----------------|---------------------------------------------|----------------|--------------------------------------------------|----------------|---------------------------------------------|----------------|---------------|----------------|
|                     |                      |             |      | PFAT (N=555) |                | Log <sub>10</sub> M (N=555) |                | 2-hr glucose (N=555) |                | Log <sub>10</sub> AIR (N=297) |                | Log <sub>10</sub> Disposition index (N=297) |                | Maximum Childhood z-score <sup>§</sup> (N=2,276) |                | Maximum Recorded BMI <sup>§</sup> (N=2,842) |                | T2D (N=3,604) |                |
|                     |                      |             |      | beta         | P*             | beta                        | p <sup>†</sup> | beta                 | p <sup>†</sup> | beta                          | p <sup>‡</sup> | beta                                        | p <sup>‡</sup> | beta                                             | p <sup>§</sup> | beta                                        | p <sup>§</sup> | OR            | p <sup>§</sup> |
| 2:rs4674941         | <i>DOCK10</i>        | C/G         | 0.93 | -0.011       | 0.99           | 0.011                       | 0.29           | -0.116               | 0.97           | -0.144                        | <b>2.8E-04</b> | 0.156                                       | <b>4.5E-04</b> | 0.031                                            | 0.61           | 0.005                                       | 0.67           | 1.15          | 0.24           |
| 2:rs12465491        | <i>OR6B3</i>         | G/A         | 0.88 | -0.371       | 0.55           | -0.004                      | 0.75           | -2.011               | 0.49           | -0.113                        | <b>6.2E-03</b> | 0.096                                       | <b>0.02</b>    | 0.111                                            | <b>0.03</b>    | 0.011                                       | 0.26           | 1.20          | <b>0.05</b>    |
| 3:rs4857302         | <i>CRYBG3</i>        | A/C         | 0.33 | -0.515       | 0.29           | 0.002                       | 0.77           | 0.355                | 0.85           | 0.031                         | 0.23           | 0.037                                       | 0.17           | 0.031                                            | 0.36           | -0.006                                      | 0.38           | 1.09          | 0.20           |
| 3:rs6804162         | <i>GUCA1C</i>        | C/T         | 0.07 | 1.539        | 0.07           | -0.020                      | 0.07           | 7.963                | <b>0.02</b>    | 0.031                         | 0.53           | -0.018                                      | 0.70           | -0.011                                           | 0.86           | 0.023                                       | 0.08           | 1.17          | 0.16           |
| 3:rs7614116         | <i>COL6A6</i>        | G/A         | 0.84 | 0.384        | 0.46           | 0.003                       | 0.69           | 1.455                | 0.54           | 0.060                         | <b>0.05</b>    | -0.068                                      | <b>0.04</b>    | 0.070                                            | 0.10           | 0.009                                       | 0.32           | 1.04          | 0.60           |
| 4:rs2301788         | <i>MAN2B2</i>        | C/T         | 0.4  | 1.280        | <b>2.4E-03</b> | -0.007                      | 0.24           | 3.823                | <b>0.03</b>    | 0.031                         | 0.14           | -0.029                                      | 0.18           | -0.023                                           | 0.48           | 0.005                                       | 0.38           | 0.94          | 0.33           |
| 4:rs9654132         | <i>FLJ16686</i>      | G/A         | 0.9  | 1.546        | <b>0.05</b>    | -0.004                      | 0.69           | -5.668               | <b>0.02</b>    | 0.014                         | 0.71           | -0.014                                      | 0.73           | -0.012                                           | 0.80           | -0.001                                      | 0.96           | 1.03          | 0.75           |
| 4:rs35597368        | <i>PDGFRA</i>        | G/A         | 0.54 | 0.237        | 0.61           | -0.018                      | <b>2.9E-03</b> | 3.091                | 0.07           | 0.028                         | 0.25           | -0.020                                      | 0.42           | 0.007                                            | 0.84           | 0.001                                       | 0.87           | 1.07          | 0.28           |
| 4:rs7699006         | <i>HERC5</i>         | G/A         | 0.89 | 0.359        | 0.64           | 0.016                       | 0.08           | -5.915               | <b>0.04</b>    | -0.032                        | 0.44           | 0.022                                       | 0.62           | 0.006                                            | 0.92           | -0.002                                      | 0.82           | 1.02          | 0.83           |
| 4:rs3762891         | <i>LOC91431</i>      | C/G         | 0.91 | 1.582        | <b>0.02</b>    | 0.012                       | 0.24           | 2.098                | 0.49           | -0.002                        | 0.95           | -0.008                                      | 0.80           | 0.008                                            | 0.87           | 0.011                                       | 0.25           | 0.90          | 0.31           |
| 4:rs25754           | <i>ADAMTS12</i>      | A/G         | 0.82 | -0.484       | 0.48           | -0.025                      | <b>2.1E-03</b> | 3.190                | 0.13           | 0.004                         | 0.88           | -0.009                                      | 0.74           | 0.007                                            | 0.87           | -0.004                                      | 0.65           | 1.05          | 0.52           |
| 5:rs638333          | <i>TMEM171</i>       | G/A         | 0.49 | -0.051       | 0.90           | 0.005                       | 0.45           | 2.633                | 0.10           | -0.047                        | <b>0.04</b>    | 0.042                                       | 0.08           | 0.012                                            | 0.69           | -0.004                                      | 0.47           | 1.06          | 0.32           |
| 5:rs636926          | <i>TMEM171</i>       | C/A         | 0.65 | 0.592        | 0.20           | 0.006                       | 0.36           | 1.878                | 0.31           | -0.053                        | <b>0.03</b>    | 0.048                                       | <b>0.05</b>    | 0.005                                            | 0.88           | 0.006                                       | 0.32           | 0.94          | 0.32           |
| 5:rs1878878         | <i>GPR98</i>         | G/A         | 0.08 | 0.672        | 0.41           | -0.031                      | <b>0.03</b>    | 3.283                | 0.33           | -0.104                        | <b>0.02</b>    | 0.130                                       | <b>5.0E-03</b> | 0.091                                            | 0.14           | 0.006                                       | 0.66           | 0.91          | 0.37           |
| <b>5:rs62624460</b> | <b><i>PCDHA8</i></b> | G/C         | 0.92 | 2.662        | <b>2.3E-04</b> | -0.006                      | 0.61           | -0.314               | 0.90           | -0.030                        | 0.44           | -0.034                                      | 0.40           | 0.098                                            | 0.12           | 0.008                                       | 0.51           | 1.24          | 0.06           |
| 5:rs10044879        | <i>FAT2</i>          | T/C         | 0.16 | 1.203        | <b>0.02</b>    | -0.006                      | 0.49           | 8.530                | <b>1.4E-03</b> | -0.033                        | 0.24           | -0.029                                      | 0.31           | -0.064                                           | 0.11           | -0.005                                      | 0.59           | 1.00          | 0.98           |
| <b>5:rs1432862</b>  | <b><i>FAT2</i></b>   | A/G         | 0.27 | 0.733        | 0.11           | -0.010                      | 0.15           | 6.851                | <b>9.5E-04</b> | -0.014                        | 0.58           | -0.020                                      | 0.43           | -0.062                                           | 0.08           | -0.008                                      | 0.27           | 0.92          | 0.23           |
| 5:rs13360277        | <i>UIMC1</i>         | C/T         | 0.1  | -0.680       | 0.32           | 0.001                       | 0.93           | -1.873               | 0.41           | -0.086                        | <b>2.8E-03</b> | 0.097                                       | <b>2.0E-03</b> | -0.002                                           | 0.97           | 0.016                                       | 0.11           | 1.09          | 0.39           |
| 6:rs2294689         | <i>TTRAP</i>         | C/G         | 0.8  | 1.793        | <b>4.2E-03</b> | -0.004                      | 0.63           | -1.630               | 0.48           | -0.020                        | 0.47           | -0.020                                      | 0.49           | 0.055                                            | 0.20           | 0.007                                       | 0.40           | 0.95          | 0.48           |
| 6:rs1801270         | <i>CDKN1A</i>        | A/C         | 0.52 | 0.217        | 0.63           | -0.003                      | 0.66           | 5.407                | <b>2.9E-03</b> | 0.024                         | 0.36           | 0.029                                       | 0.28           | 0.037                                            | 0.25           | 0.011                                       | 0.08           | 0.98          | 0.73           |
| 6:rs3747742         | <i>TREML2</i>        | T/C         | 0.4  | -0.111       | 0.78           | -0.013                      | <b>0.04</b>    | 0.521                | 0.79           | 0.021                         | 0.36           | 0.011                                       | 0.65           | -0.043                                           | 0.21           | -0.006                                      | 0.35           | 1.11          | 0.08           |
| 6:43968814          | <i>C6orf223</i>      | G/A         | 0.16 | 1.218        | <b>0.01</b>    | -0.003                      | 0.68           | -1.403               | 0.47           | 0.058                         | <b>0.03</b>    | -0.061                                      | <b>0.03</b>    | 0.005                                            | 0.91           | 0.010                                       | 0.23           | 0.84          | 0.04           |
| 6:rs2297019         | <i>MEP1A</i>         | A/G         | 0.71 | 1.339        | <b>2.3E-03</b> | 0.000                       | 1.00           | 4.475                | <b>0.01</b>    | 0.040                         | 0.08           | 0.040                                       | 0.08           | -0.021                                           | 0.54           | -0.001                                      | 0.89           | 0.92          | 0.19           |
| 6:rs2747701         | <i>FAM135A</i>       | T/C         | 0.9  | 1.914        | <b>0.02</b>    | 0.010                       | 0.37           | -3.901               | 0.19           | -0.008                        | 0.84           | 0.001                                       | 0.99           | -0.035                                           | 0.55           | 0.008                                       | 0.46           | 0.95          | 0.59           |
| 6:rs2295837         | <i>FIG4</i>          | T/A         | 0.19 | -0.294       | 0.58           | -0.020                      | <b>4.2E-03</b> | -0.099               | 0.96           | 0.040                         | 0.15           | 0.017                                       | 0.55           | -0.050                                           | 0.22           | -0.006                                      | 0.47           | 1.10          | 0.18           |

| chr:SNP             | Gene         | R/NR allele | fR   | Sample 1     |                |                             |                |                      |                |                               |                |                                             |                | Sample 2                                         |                |                                             |                |               |                |
|---------------------|--------------|-------------|------|--------------|----------------|-----------------------------|----------------|----------------------|----------------|-------------------------------|----------------|---------------------------------------------|----------------|--------------------------------------------------|----------------|---------------------------------------------|----------------|---------------|----------------|
|                     |              |             |      | PFAT (N=555) |                | Log <sub>10</sub> M (N=555) |                | 2-hr glucose (N=555) |                | Log <sub>10</sub> AIR (N=297) |                | Log <sub>10</sub> Disposition index (N=297) |                | Maximum childhood z-score <sup>§</sup> (N=2,276) |                | Maximum Recorded BMI <sup>§</sup> (N=2,842) |                | T2D (N=3,604) |                |
|                     |              |             |      | beta         | P <sup>*</sup> | beta                        | p <sup>†</sup> | beta                 | p <sup>†</sup> | beta                          | p <sup>‡</sup> | beta                                        | p <sup>‡</sup> | beta                                             | p <sup>§</sup> | beta                                        | p <sup>§</sup> | OR            | p <sup>§</sup> |
| 6:rs2244008         | LAMA2        | C/T         | 0.2  | 1.135        | <b>0.02</b>    | 0.001                       | 0.92           | -1.053               | 0.64           | -0.015                        | 0.67           | 0.019                                       | 0.60           | 0.047                                            | 0.26           | 0.000                                       | 0.97           | 1.02          | 0.84           |
| <b>7:rs2070607</b>  | <b>OGDH</b>  | G/A         | 0.92 | -1.475       | 0.02           | -0.008                      | 0.46           | 1.190                | 0.60           | -0.093                        | <b>3.1E-04</b> | 0.100                                       | <b>2.0E-04</b> | -0.014                                           | 0.81           | -0.021                                      | 0.06           | 1.01          | 0.92           |
| 7:rs1830035         | ZNF679       | G/A         | 0.23 | 0.609        | 0.20           | -0.019                      | <b>0.01</b>    | 1.840                | 0.37           | 0.008                         | 0.76           | 0.011                                       | 0.69           | 0.054                                            | 0.15           | 0.010                                       | 0.14           | 0.97          | 0.64           |
| 7:86978458          | CROT         | G/A         | 0.24 | 0.727        | 0.16           | 0.001                       | 0.91           | 0.215                | 0.92           | -0.017                        | 0.54           | 0.020                                       | 0.48           | 0.018                                            | 0.63           | 0.002                                       | 0.83           | 1.14          | 0.07           |
| 7:rs542137          | ZAN          | G/C         | 0.81 | 0.507        | 0.40           | -0.006                      | 0.43           | -0.684               | 0.74           | -0.059                        | <b>0.01</b>    | -0.068                                      | <b>0.01</b>    | -0.078                                           | 0.06           | -0.007                                      | 0.41           | 1.05          | 0.51           |
| 7:rs74343948        | FAM71F2      | G/C         | 0.93 | 0.668        | 0.42           | -0.042                      | <b>1.0E-03</b> | 3.846                | 0.24           | -0.019                        | 0.63           | -0.043                                      | 0.31           | 0.040                                            | 0.41           | -0.009                                      | 0.45           | 1.11          | 0.37           |
| 7:rs9088            | TMEM176A     | A/G         | 0.45 | 0.530        | 0.23           | 0.000                       | 0.99           | -2.109               | 0.28           | 0.017                         | 0.47           | 0.012                                       | 0.63           | -0.042                                           | 0.19           | -0.003                                      | 0.65           | 1.02          | 0.76           |
| 9:rs6475273         | FAM154A      | C/T         | 0.36 | 0.082        | 0.85           | 0.001                       | 0.84           | 1.829                | 0.33           | -0.067                        | <b>3.0E-03</b> | 0.057                                       | <b>0.02</b>    | 0.008                                            | 0.80           | -0.003                                      | 0.61           | 0.94          | 0.31           |
| 9:rs17062264        | PCSK5        | C/G         | 0.68 | 0.045        | 0.93           | -0.015                      | <b>0.03</b>    | 1.389                | 0.45           | -0.023                        | 0.37           | 0.041                                       | 0.11           | 0.063                                            | 0.07           | 0.009                                       | 0.17           | 1.11          | 0.09           |
| 10:rs7918793        | ACBD5        | T/C         | 0.45 | 0.486        | 0.28           | -0.003                      | 0.68           | 2.882                | 0.08           | -0.050                        | <b>0.02</b>    | -0.057                                      | <b>0.01</b>    | 0.042                                            | 0.17           | 0.006                                       | 0.33           | 1.12          | 0.06           |
| 10:rs2291428        | MARCH 8      | G/C         | 0.33 | 1.166        | <b>0.03</b>    | -0.008                      | 0.16           | 0.374                | 0.85           | -0.033                        | 0.16           | 0.039                                       | 0.11           | 0.057                                            | 0.09           | 0.004                                       | 0.60           | 0.98          | 0.76           |
| 10:rs1062465        | KIF20B       | T/A         | 0.14 | -1.337       | <b>0.01</b>    | -0.016                      | 0.08           | 6.215                | <b>8.1E-03</b> | -0.027                        | 0.45           | -0.035                                      | 0.35           | 0.048                                            | 0.33           | -0.005                                      | 0.59           | 1.18          | 0.07           |
| 11:rs2499953        | MMP26        | C/T         | 0.43 | 0.924        | <b>0.04</b>    | -0.015                      | <b>0.02</b>    | -0.419               | 0.82           | 0.026                         | 0.23           | -0.019                                      | 0.39           | 0.020                                            | 0.55           | 0.005                                       | 0.43           | 1.02          | 0.75           |
| 11:rs2512219        | OR8D2        | C/T         | 0.87 | 1.290        | <b>0.02</b>    | 0.006                       | 0.46           | -3.014               | 0.21           | -0.012                        | 0.67           | 0.006                                       | 0.82           | 0.043                                            | 0.36           | 0.010                                       | 0.26           | 0.88          | 0.17           |
| 11:rs138907505      | HIPK3        | C/G         | 0.93 | -0.954       | 0.17           | 0.012                       | 0.26           | -1.552               | 0.59           | -0.106                        | <b>8.6E-03</b> | -0.097                                      | <b>0.02</b>    | -0.052                                           | 0.36           | -0.007                                      | 0.55           | 1.03          | 0.78           |
| <b>11:rs1064608</b> | <b>MTCH2</b> | G/C         | 0.5  | 1.453        | <b>3.1E-04</b> | 0.007                       | 0.29           | -4.496               | <b>0.01</b>    | 0.035                         | 0.13           | -0.039                                      | 0.09           | 0.044                                            | 0.18           | 0.005                                       | 0.43           | 0.98          | 0.72           |
| 11:rs7947780        | C11orf82     | T/G         | 0.59 | -0.258       | 0.61           | -0.019                      | <b>5.9E-03</b> | 1.751                | 0.33           | -0.051                        | <b>0.04</b>    | -0.063                                      | <b>0.02</b>    | 0.018                                            | 0.57           | 0.015                                       | <b>0.02</b>    | 1.01          | 0.88           |
| 11:rs7130899        | C11orf82     | T/C         | 0.73 | -0.350       | 0.51           | -0.020                      | <b>4.8E-03</b> | 1.743                | 0.33           | -0.032                        | 0.21           | -0.051                                      | 0.04           | 0.038                                            | 0.28           | 0.011                                       | 0.11           | 1.04          | 0.51           |
| <b>11:118244312</b> | <b>UBE4A</b> | G/A         | 0.96 | -0.314       | 0.79           | -0.034                      | 0.06           | 17.154               | <b>2.7E-04</b> | 0.026                         | 0.79           | -0.025                                      | 0.79           | 0.019                                            | 0.82           | -0.016                                      | 0.30           | 1.03          | 0.82           |
| 12:rs4980895        | CCDC77       | C/A         | 0.26 | -0.153       | 0.78           | -0.012                      | 0.07           | 4.435                | <b>0.03</b>    | 0.001                         | 0.98           | -0.003                                      | 0.91           | -0.005                                           | 0.90           | -0.009                                      | 0.18           | 1.11          | 0.14           |
| 12:rs17788563       | ANO2         | C/T         | 0.92 | -0.949       | 0.17           | 0.016                       | 0.10           | -0.659               | 0.80           | -0.102                        | <b>0.01</b>    | 0.097                                       | <b>0.02</b>    | 0.095                                            | 0.09           | 0.020                                       | 0.08           | 1.01          | 0.95           |
| 12:rs1056320        | DENND5B      | G/T         | 0.93 | 1.184        | 0.10           | -0.007                      | 0.59           | 0.958                | 0.74           | 0.118                         | <b>0.02</b>    | -0.108                                      | <b>0.05</b>    | 0.065                                            | 0.25           | 0.005                                       | 0.65           | 0.98          | 0.87           |
| 15:rs17677991       | MGA          | G/C         | 0.55 | 0.735        | 0.06           | 0.001                       | 0.90           | -3.739               | <b>0.02</b>    | 0.006                         | 0.82           | -0.004                                      | 0.87           | 0.047                                            | 0.14           | 0.013                                       | <b>0.04</b>    | 1.06          | 0.36           |
| 15:rs35875311       | FANCI        | A/T         | 0.16 | -0.079       | 0.90           | 0.000                       | 1.00           | 0.817                | 0.74           | -0.057                        | <b>0.03</b>    | -0.058                                      | <b>0.03</b>    | 0.022                                            | 0.62           | 0.001                                       | 0.88           | 0.87          | 0.09           |
| 15:rs140893433      | LYSM4        | G/A         | 0.18 | -0.789       | 0.19           | -0.004                      | 0.64           | 5.011                | <b>0.04</b>    | -0.045                        | 0.19           | 0.043                                       | 0.24           | 0.021                                            | 0.62           | -0.002                                      | 0.85           | 1.03          | 0.68           |

| chr:SNP              | Gene                 | R/NR allele | fR   | Sample 1     |             |                             |                |                      |                |                               |                |                                             |                | Sample 2                                         |                |                                             |                |               |                |
|----------------------|----------------------|-------------|------|--------------|-------------|-----------------------------|----------------|----------------------|----------------|-------------------------------|----------------|---------------------------------------------|----------------|--------------------------------------------------|----------------|---------------------------------------------|----------------|---------------|----------------|
|                      |                      |             |      | PFAT (N=555) |             | Log <sub>10</sub> M (N=555) |                | 2-hr glucose (N=555) |                | Log <sub>10</sub> AIR (N=297) |                | Log <sub>10</sub> Disposition index (N=297) |                | Maximum Childhood z-score <sup>§</sup> (N=2,276) |                | Maximum Recorded BMI <sup>§</sup> (N=2,842) |                | T2D (N=3,604) |                |
|                      |                      |             |      | beta         | P*          | beta                        | p <sup>†</sup> | beta                 | p <sup>†</sup> | beta                          | p <sup>‡</sup> | beta                                        | p <sup>‡</sup> | beta                                             | p <sup>§</sup> | beta                                        | p <sup>§</sup> | OR            | p <sup>§</sup> |
|                      |                      |             |      |              |             |                             |                |                      |                |                               |                |                                             |                |                                                  |                |                                             |                |               |                |
| 17:rs9902398         | <i>SMYD4</i>         | C/T         | 0.87 | -0.787       | 0.19        | 0.015                       | 0.09           | -0.650               | 0.77           | -0.014                        | 0.58           | -0.006                                      | 0.82           | -0.032                                           | 0.48           | -0.017                                      | <b>0.05</b>    | 0.97          | 0.68           |
| 17:rs1133295         | <i>STX8</i>          | G/T         | 0.93 | 1.640        | <b>0.03</b> | -0.004                      | 0.73           | -1.479               | 0.58           | -0.016                        | 0.69           | 0.034                                       | 0.39           | 0.019                                            | 0.75           | 0.001                                       | 0.91           | 1.12          | 0.35           |
| <b>18:rs2282632</b>  | <b><i>ASXL3</i></b>  | A/G         | 0.12 | -0.044       | 0.94        | -0.036                      | <b>2.0E-05</b> | 2.103                | 0.47           | -0.026                        | 0.51           | -0.039                                      | 0.34           | -0.010                                           | 0.85           | -0.017                                      | 0.09           | 1.05          | 0.60           |
| <b>19:rs16978738</b> | <b><i>ZNF225</i></b> | T/A         | 0.61 | 0.558        | 0.23        | -0.014                      | <b>0.05</b>    | 7.053                | <b>3.2E-04</b> | -0.029                        | 0.21           | -0.034                                      | 0.17           | 0.026                                            | 0.43           | 0.016                                       | <b>0.01</b>    | 1.02          | 0.79           |
| 19:rs3745833         | <i>GALP</i>          | C/G         | 0.71 | -0.506       | 0.28        | 0.006                       | 0.39           | 2.049                | 0.33           | -0.053                        | <b>0.04</b>    | -0.045                                      | <b>0.10</b>    | -0.030                                           | 0.42           | 0.004                                       | 0.55           | 1.11          | 0.14           |
| 20:rs450739          | <i>RAD21L1</i>       | A/G         | 0.8  | -0.829       | 0.13        | -0.016                      | <b>0.05</b>    | 4.024                | 0.07           | 0.057                         | <b>0.04</b>    | 0.041                                       | <b>0.17</b>    | 0.051                                            | 0.21           | -0.001                                      | 0.92           | 1.17          | <b>0.04</b>    |
| 20:rs72620874        | <i>SIRPA</i>         | C/G         | 0.6  | 0.197        | 0.67        | 0.003                       | 0.64           | 4.058                | <b>0.03</b>    | -0.005                        | 0.85           | -0.007                                      | 0.77           | 0.004                                            | 0.92           | -0.001                                      | 0.82           | 1.13          | 0.08           |
| 20:rs6079391         | <i>FLRT3</i>         | T/G         | 0.45 | -0.342       | 0.42        | 0.006                       | 0.37           | -1.656               | 0.35           | -0.059                        | <b>8.3E-03</b> | -0.055                                      | <b>0.02</b>    | -0.022                                           | 0.49           | -0.009                                      | 0.17           | 1.10          | 0.14           |
| 20:rs707555          | <i>PCK1</i>          | C/G         | 0.75 | -0.613       | 0.27        | -0.018                      | <b>0.03</b>    | 4.568                | <b>0.02</b>    | 0.007                         | 0.80           | 0.008                                       | 0.78           | 0.025                                            | 0.51           | -0.006                                      | 0.44           | 1.03          | 0.66           |
| 20:rs2295357         | <i>CTSZ</i>          | C/A         | 0.87 | 1.246        | <b>0.05</b> | -0.001                      | 0.95           | 3.267                | 0.26           | 0.001                         | 0.97           | 0.005                                       | 0.91           | 0.038                                            | 0.42           | 0.013                                       | 0.17           | 1.01          | 0.95           |
| 20:rs1883847         | <i>DIDO1</i>         | A/G         | 0.47 | 0.435        | 0.34        | -0.013                      | <b>0.03</b>    | 2.985                | 0.11           | 0.025                         | 0.31           | 0.029                                       | 0.24           | -0.050                                           | 0.15           | 0.000                                       | 0.96           | 1.01          | 0.92           |
| 20:rs1883848         | <i>DIDO1</i>         | G/A         | 0.59 | 0.993        | <b>0.02</b> | -0.015                      | <b>0.01</b>    | 1.306                | 0.44           | 0.002                         | 0.92           | 0.002                                       | 0.94           | -0.044                                           | 0.19           | 0.003                                       | 0.70           | 0.98          | 0.71           |
| 22:rs7575            | <i>MRPL40</i>        | T/C         | 0.12 | 0.404        | 0.52        | 0.004                       | 0.71           | -2.672               | 0.28           | -0.079                        | <b>0.03</b>    | -0.077                                      | <b>0.05</b>    | 0.020                                            | 0.68           | 0.004                                       | 0.63           | 1.03          | 0.72           |
| 22:rs1018448         | <i>ARFGAP3</i>       | C/A         | 0.9  | 0.218        | 0.76        | -0.012                      | 0.24           | 5.507                | <b>0.05</b>    | -0.067                        | 0.07           | 0.077                                       | <b>0.04</b>    | 0.021                                            | 0.69           | 0.005                                       | 0.64           | 1.11          | 0.31           |

R: risk allele based on the trait with the best *p* value, NR: non-risk allele, fR: frequency of risk allele, PFAT: percent body fat, Log<sub>10</sub> M: logarithmic value of glucose disposal rate during insulin infusion, 2-hr glucose: 2-hour plasma glucose concentrations in response to a 75g OGTT, Log<sub>10</sub> AIR: logarithmic value of acute insulin response to a 25g intravenous glucose bolus, § Maximum recorded BMI is defined as the highest BMI measured at a longitudinal exam at which the subject was non-diabetic and >15 years of age, § Childhood z-score is the highest age and sex adjusted Z score from an exam at age<20 yr.

\* *p* values were adjusted for age, sex and nuclear family membership; † *p* values were adjusted for age, sex, PFAT and nuclear family membership; ‡ analysis is restricted to full-heritage Pima Indians who are normal glucose tolerant and *p* values were adjusted for age, sex, PFAT, nuclear family membership and Log<sub>10</sub> M (for AIR only). § *p* values were adjusted for age, sex, birth year, nuclear family membership. *p*≤0.05 was highlighted in bold. SNPs shown in Table 1 are highlighted in bold, novel SNPs are underlined with dashed lines.

**Table S6 SNPs genotyped in all Samples 1-3 and their association with pre-diabetic traits (PFAT, Log<sub>10</sub>M, 2-hr glucose, Log<sub>10</sub>AIR, disposition index, maximum childhood z-score and maximum recorded BMI) and T2D.**

| chr:SNP              | Gene                | R/NR | fR   | Sample 1           |                                |                         |                                  |                                                       | Sample 2                                        |                                          |                    | Sample 3                                      |                                          |                   | Sample 2+3 combined                           |                                          |                    |
|----------------------|---------------------|------|------|--------------------|--------------------------------|-------------------------|----------------------------------|-------------------------------------------------------|-------------------------------------------------|------------------------------------------|--------------------|-----------------------------------------------|------------------------------------------|-------------------|-----------------------------------------------|------------------------------------------|--------------------|
|                      |                     |      |      | PFAT<br>(N=555)    | Log <sub>10</sub> M<br>(N=555) | 2-hr glucose<br>(N=555) | Log <sub>10</sub> AIR<br>(N=297) | Log <sub>10</sub> Dispo<br>sition<br>index<br>(N=297) | Maximum<br>Childhood z-<br>score §<br>(N=2,276) | Maximum<br>Recorded<br>BMI§<br>(N=2,842) | T2D<br>(N=3,604)   | Maximum<br>Childhood<br>z-score§<br>(N=3,040) | Maximum<br>Recorded<br>BMI§<br>(N=3,038) | T2D<br>(N=4,063)  | Maximum<br>Childhood<br>z-score§<br>(N=5,316) | Maximum<br>Recorded<br>BMI§<br>(N=5,880) | T2D<br>(N=7,667)   |
|                      |                     |      |      | beta/p*            | beta/p†                        | beta/p†                 | beta/p‡                          | beta/p‡                                               | beta/p‡                                         | beta/p‡                                  | OR/p‡              | beta/p <sup>§</sup>                           | beta/p <sup>§</sup>                      | OR/p <sup>§</sup> | beta/p <sup>§</sup>                           | beta/p <sup>§</sup>                      | OR/p <sup>§</sup>  |
| 12:rs2075260         | <i>ACACB</i>        | T/C  | 0.96 | 0.09/0.94          | 0.01/0.65                      | 3.21/0.49               | 0.004/0.93                       | 0.034/0.51                                            | 0.15/0.08                                       | 0.02/0.25                                | <b>1.39/0.03</b>   | <b>0.10/0.03</b>                              | 0.02/0.16                                | <b>1.31/0.04</b>  | <b>0.12/5.3E-3</b>                            | 0.01/0.1                                 | <b>1.35/3.8E-3</b> |
| 4:rs309370           | <i>BBS12</i>        | T/C  | 0.55 | 0.37/0.36          | <b>-0.01/0.04</b>              | 1.24/0.45               | -0.04/0.15                       | -0.045/0.08                                           | 0.06/0.07                                       | -0.00/0.98                               | <b>1.19/2.7E-3</b> | -0.03/0.29                                    | -0.01/0.48                               | 1.06/0.37         | 0.01/0.79                                     | -0.002/0.63                              | <b>1.13/4.3E-3</b> |
| 19:rs2360543         | <i>ZNF530</i>       | T/A  | 0.48 | 0.48/0.32          | <b>-0.01/0.03</b>              | 2.89/0.13               | 0.008/0.74                       | 0.009/0.71                                            | -0.009/0.77                                     | -0.01/0.40                               | <b>1.17/7.6E-3</b> | -0.009/0.77                                   | -0.01/0.32                               | 1.09/0.19         | -0.01/0.74                                    | -0.006/0.21                              | <b>1.13/5.5E-3</b> |
| 6:44081587           | <i>MRPL14</i>       | G/T  | 0.03 | <b>2.74/1.2E-3</b> | 0.003/0.86                     | -3.70/0.35              | -0.002/0.96                      | -0.012/0.82                                           | -0.13/0.12                                      | 0.01/0.47                                | <b>0.62/7.0E-3</b> | 0.11/0.37                                     | 0.04/0.10                                | 0.77/0.34         | -0.02/0.82                                    | 0.02/0.12                                | <b>0.66/5.8E-3</b> |
| <b>12:120990399</b>  | <b><i>RNF10</i></b> | C/T  | 0.97 | 1.36/0.26          | 0.003/0.86                     | -1.95/0.69              | -0.03/0.46                       | -0.004/0.93                                           | <b>0.37/1.3E-7</b>                              | <b>0.05/6.8E-4</b>                       | <b>1.82/2.0E-3</b> | <b>0.18/0.03</b>                              | 0.03/0.20                                | 1.03/0.89         | <b>0.27/8.5E-7</b>                            | <b>0.04/7.2E-4</b>                       | <b>1.49/9.5E-3</b> |
| <b>18:rs7238987</b>  | <b><i>CYB5A</i></b> | T/C  | 0.32 | <b>2.03/7.0E-6</b> | -0.008/0.31                    | 0.83/0.69               | 0.04/0.19                        | -0.037/0.22                                           | 0.05/0.17                                       | <b>0.02/2.0E-4</b>                       | 1.10/0.13          | <b>0.11/1.2E-3</b>                            | <b>0.02/1.2E-3</b>                       | <b>1.18/0.03</b>  | <b>0.08/5.9E-4</b>                            | <b>0.02/6.2E-7</b>                       | <b>1.13/1.0E-2</b> |
| 6:rs9358856          | <i>LRRC16A</i>      | C/T  | 0.82 | <b>1.38/0.02</b>   | -0.01/0.10                     | 4.11/0.08               | <b>-0.07/0.03</b>                | <b>0.081/0.01</b>                                     | <b>0.14/3.1E-4</b>                              | <b>0.02/0.01</b>                         | 1.15/0.07          | -0.012/0.67                                   | 0.010/0.41                               | 1.16/0.09         | 0.05/0.08                                     | <b>0.01/2.2E-2</b>                       | <b>1.15/1.3E-2</b> |
| 1:rs3795523          | <i>CENPF</i>        | C/G  | 0.42 | <b>1.38/1.7E-3</b> | -0.006/0.41                    | 0.95/0.59               | 0.010/0.67                       | 0.011/0.67                                            | <b>0.06/0.04</b>                                | <b>0.02/1.1E-4</b>                       | 1.11/0.07          | -0.01/0.72                                    | 0.004/0.58                               | 0.92/0.25         | 0.02/0.30                                     | <b>0.02/1.3E-3</b>                       | 1.03/0.49          |
| 7:rs854524           | <i>PPP1R9A</i>      | A/G  | 0.81 | <b>1.18/0.03</b>   | -0.006/0.45                    | 0.98/0.68               | 0.03/0.29                        | 0.029/0.33                                            | 0.03/0.41                                       | <b>0.02/7.0E-3</b>                       | 1.11/0.17          | 0.02/0.62                                     | 0.02/0.05                                | 1.06/0.47         | 0.03/0.35                                     | <b>0.17/1.5E-3</b>                       | 1.09/0.13          |
| 3:rs2270781          | <i>WDR52</i>        | C/T  | 0.84 | <b>1.48/7.4E-3</b> | 0.006/0.47                     | 0.49/0.85               | 0.03/0.40                        | -0.026/0.42                                           | 0.06/0.15                                       | <b>0.02/0.03</b>                         | 1.07/0.37          | 0.05/0.25                                     | <b>0.02/0.04</b>                         | 1.02/0.85         | 0.06/0.06                                     | <b>0.02/2.8E-3</b>                       | 1.04/0.44          |
| 1:rs5368             | <i>SELE</i>         | T/C  | 0.72 | <b>1.01/0.05</b>   | 0.002/0.76                     | 3.58/0.07               | 0.02/0.59                        | 0.021/0.48                                            | <b>0.10/5.6E-3</b>                              | <b>0.02/7.3E-3</b>                       | 1.00/0.99          | 0.002/0.96                                    | 0.01/0.18                                | 0.99/0.94         | 0.04/0.09                                     | <b>0.01/5.0E-3</b>                       | 1.0/0.97           |
| 10:rs156697          | <i>GSTO2</i>        | T/C  | 0.95 | <b>2.15/0.01</b>   | 0.002/0.90                     | -2.92/0.47              | 0.01/0.85                        | 0.018/0.76                                            | <b>0.15/0.02</b>                                | <b>0.04/7.4E-3</b>                       | 1.10/0.50          | 0.07/0.11                                     | 0.01/0.23                                | 1.01/0.92         | <b>0.09/0.02</b>                              | <b>0.02/2.9E-2</b>                       | 1.04/0.68          |
| 1:rs2235541          | <i>TCEB3</i>        | C/T  | 0.97 | <b>4.14/1.7E-3</b> | 0.009/0.58                     | -4.27/0.28              | 0.05/0.45                        | -0.045/0.43                                           | <b>0.22/0.02</b>                                | <b>0.05/0.01</b>                         | 1.32/0.16          | -0.02/0.82                                    | 0.01/0.37                                | 0.96/0.81         | 0.06/0.29                                     | <b>0.02/3.5E-2</b>                       | 1.08/0.55          |
| 2:rs11677877         | <i>COL4A3</i>       | A/G  | 0.75 | <b>1.17/0.03</b>   | 0.003/0.70                     | -1.66/0.41              | -0.02/0.46                       | -0.018/0.47                                           | 0.05/0.13                                       | <b>0.01/0.05</b>                         | 0.93/0.29          | <b>0.07/0.05</b>                              | 0.01/0.30                                | 0.92/0.27         | <b>0.06/0.02</b>                              | 0.01/0.06                                | 0.92/0.12          |
| 2:rs12463674         | <i>TTN</i>          | C/T  | 0.11 | <b>1.16/0.05</b>   | <b>-0.02/0.007</b>             | 2.80/0.27               | -0.02/0.70                       | 0.024/0.60                                            | <b>0.11/0.02</b>                                | <b>0.02/6.7E-3</b>                       | 1.02/0.84          | -0.06/0.18                                    | -0.01/0.37                               | 1.03/0.77         | 0.02/0.58                                     | 0.01/0.24                                | 1.02/0.78          |
| <b>17:rs12453124</b> | <b><i>KRT27</i></b> | C/T  | 0.43 | 0.51/0.29          | -0.01/0.08                     | <b>5.14/3.8E-3</b>      | <b>-0.07/6.4E-4</b>              | <b>0.074/1.1E-3</b>                                   | <b>0.06/0.04</b>                                | 0.001/0.86                               | 1.09/0.14          | 0.01/0.86                                     | -0.003/0.58                              | 0.96/0.58         | 0.033/0.13                                    | -0.002/0.73                              | 1.04/0.43          |
| 9:rs35929428         | <i>PTPRD</i>        | G/A  | 0.82 | <b>1.25/0.02</b>   | -0.001/0.93                    | -2.38/0.31              | -0.020/0.51                      | 0.009/0.79                                            | 0.03/0.50                                       | <b>0.02/0.05</b>                         | 0.97/0.68          | -0.03/0.47                                    | -0.01/0.16                               | 0.93/0.42         | -0.01/0.83                                    | 0.002/0.76                               | 0.96/0.45          |
| 19:rs366793          | <i>ZNF701</i>       | T/A  | 0.61 | -0.73/0.09         | -0.004/0.51                    | 3.56/0.03               | -0.04/0.07                       | -0.043/0.08                                           | <b>-0.08/0.01</b>                               | <b>-0.01/0.02</b>                        | 0.97/0.63          | 0.06/0.08                                     | 0.01/0.06                                | 1.10/0.16         | -0.00/0.98                                    | -0.00/0.96                               | 1.03/0.52          |
| 1:rs3806339          | <i>GBP5</i>         | A/G  | 0.10 | 1.05/0.10          | 0.000/0.97                     | -2.19/0.44              | 0.02/0.68                        | 0.019/0.61                                            | <b>0.11/0.03</b>                                | <b>0.02/0.01</b>                         | 1.32/0.16          | 0.01/0.91                                     | 0.004/0.76                               | 0.81/0.12         | 0.06/0.12                                     | 0.01/0.07                                | 0.86/0.07          |
| 11:rs11227599        | <i>OR5T2</i>        | T/C  | 0.13 | <b>-1.44/0.02</b>  | 0.01/0.27                      | -3.30/0.18              | <b>-0.08/7.0E-3</b>              | <b>-0.073/0.01</b>                                    | 0.000/1.00                                      | -0.01/0.16                               | <b>1.27/6.0E-3</b> | -0.01/0.87                                    | -0.002/0.82                              | <b>0.77/0.02</b>  | -0.001/0.99                                   | -0.01/0.36                               | 1.02/0.76          |

R: risk allele based on the trait with the best *p* value, NR: non-risk allele, fR: frequency of risk allele, § Maximum recorded BMI is defined as the highest BMI measured at a longitudinal exam at which the subject was non-diabetic and >15 years of age, § Maximum childhood z-score is the highest age and sex adjusted z score from an exam at age <20 yr. \* *p* values were adjusted for age, sex, birth year, nuclear family membership and the estimate of admixture. † *p* values were adjusted for age, sex, birth year,



nuclear family membership. <sup>†</sup> *p* values were adjusted for age, sex, birth year, nuclear family membership and estimated admixture.  $p \leq 0.05$  was highlighted in bold. SNPs shown in Table 1 are highlighted in bold.
